# Supplementary material for: Reactive Oxygen Species Differentially Modulate the Metabolic and Transcriptomic Response of Endothelial Cells
Source: MDPI journal article supplement (doi:10.3390/antiox11020434), 2022-02-21
Supplement: s1 [file s1]

# Supplementary Materials: Reactive Oxygen Species Differentially Modulate the Metabolic and Transcriptomic Response of Endothelial Cells

Niklas Müller <sup>1,2</sup>, Timothy Warwick <sup>1,2</sup>, Kurt Noack <sup>1,2</sup>, Pedro F. Malacarne <sup>1,2</sup>, Arthur J.L. Cooper <sup>3</sup>, Norbert Weissmann <sup>4</sup>, Katrin Schröder <sup>1,2</sup>, Ralf P. Brandes <sup>1,2</sup> and Flávia Rezende <sup>1,2,\*</sup>

<sup>1</sup> Institute for Cardiovascular Physiology, Goethe University, Theodor-Stern Kai 7, 60590 Frankfurt, Germany; nmueller@vrc.uni-frankfurt.de (K.M.); warwick@vrc.uni-frankfurt.de (W.T.); kunoack@students.uni-mainz.de (K.N.); malacarne@vrc.uni-frankfurt.de (P.F.M.);

schroeder@vrc.uni-frankfurt.de (K.S.); brandes@vrc.uni-frankfurt.de (R.P.B.)

<sup>2</sup> German Center of Cardiovascular Research (DZHK), Partner Site Rhein Main, 60590 Frankfurt, Germany

<sup>3</sup> Department of Biochemistry and Molecular Biology, New York Medical College, 15 Dana Road, Valhalla, NY 10595, USA; arthur\_cooper@nymc.edu

<sup>4</sup> Excellence Cluster Cardio-Pulmonary Institute (CPI), University of Giessen and Marburg Lung Center (UGMLC), Member of the German Center for Lung Research (DZL), Justus-Liebig-University, Giessen, 35390 Germany; norbert.weissmann@innere.med.uni-giessen.de

\* Correspondence: rezende@vrc.uni-frankfurt.de; Tel.: +49-69-6301-85321; Fax: +49-69-6301-7668

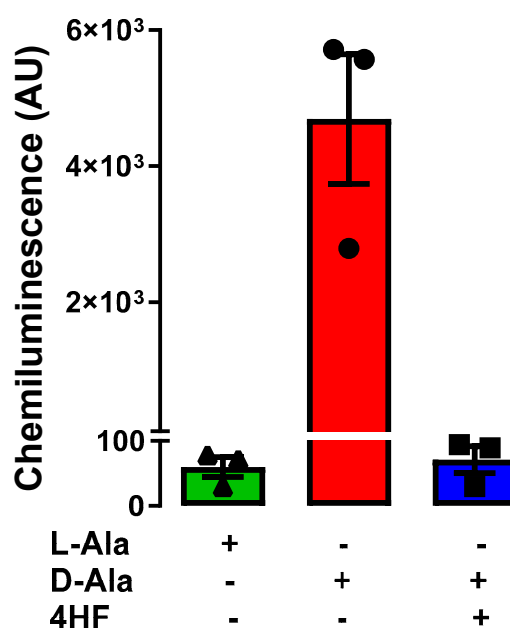

**Supplementary Figure S1: H<sub>2</sub>O<sub>2</sub> production by HUVEC-DAO.** H<sub>2</sub>O<sub>2</sub> (n=3) assessed by chemiluminescence with luminol (100 μM)/ HRP (1 U/mL) after exposure to D- or L-alanine with or without pre-incubation (10 min) with the DAO inhibitor 4HF (1 μmol/L) (n=3).

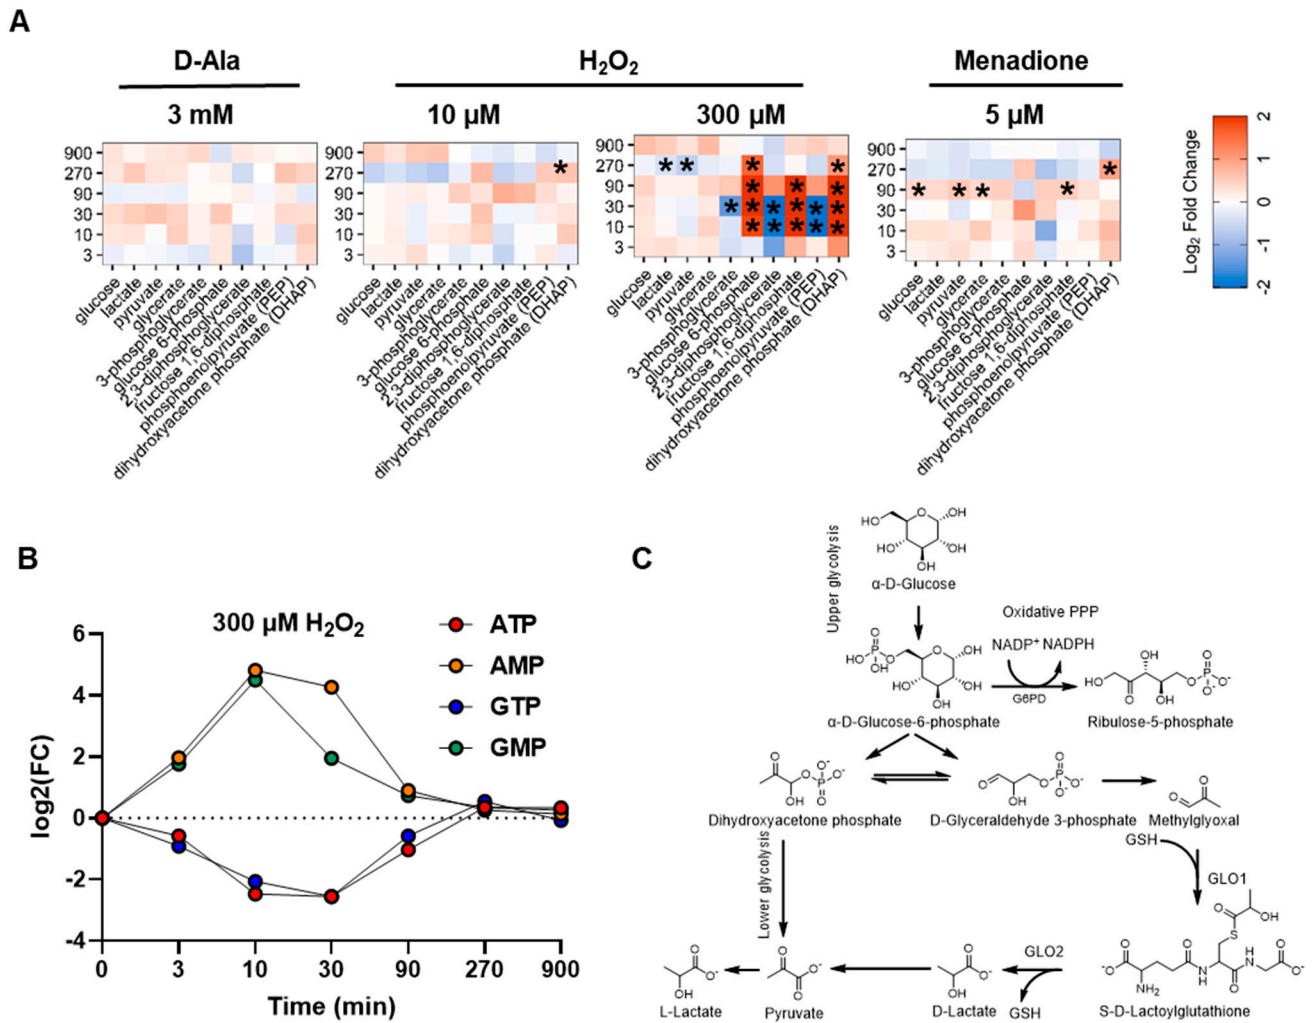

**Supplementary Figure S2: Changes in glycolysis and nucleotide metabolism in HUVEC in response to different oxidative stimuli. (A): Heat maps of glucose metabolism. (B): Changes in ATP, AMP, GTP and GMP after exposure to 300 μM H<sub>2</sub>O<sub>2</sub>. (C): Fates of glucose and S-lactoylglutathione pathway.**

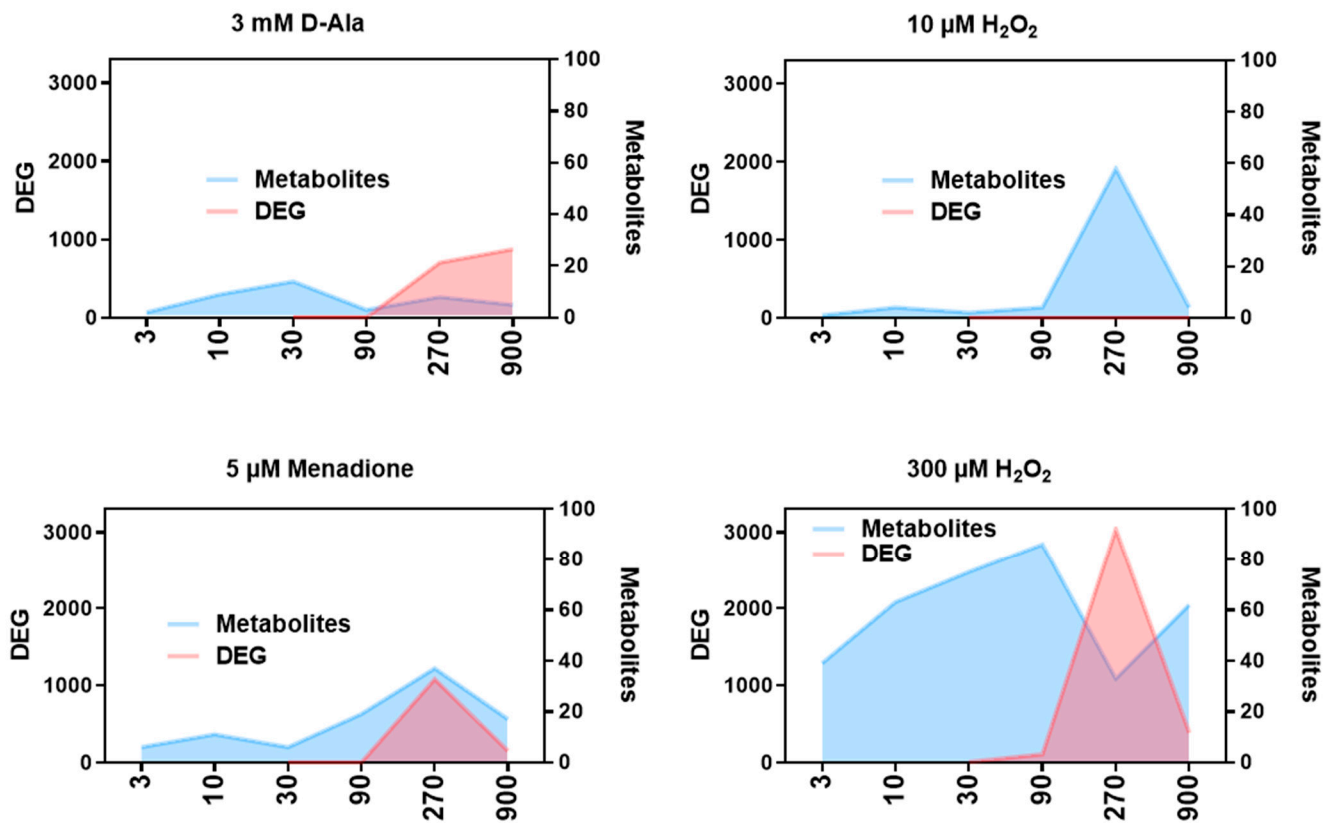

**Supplementary Figure S3: High degree of dissimilarity between effects of different ROS exposures to HUVEC.** Time course changes in metabolomics and transcriptomics of HUVEC in response to different oxidative stimuli.

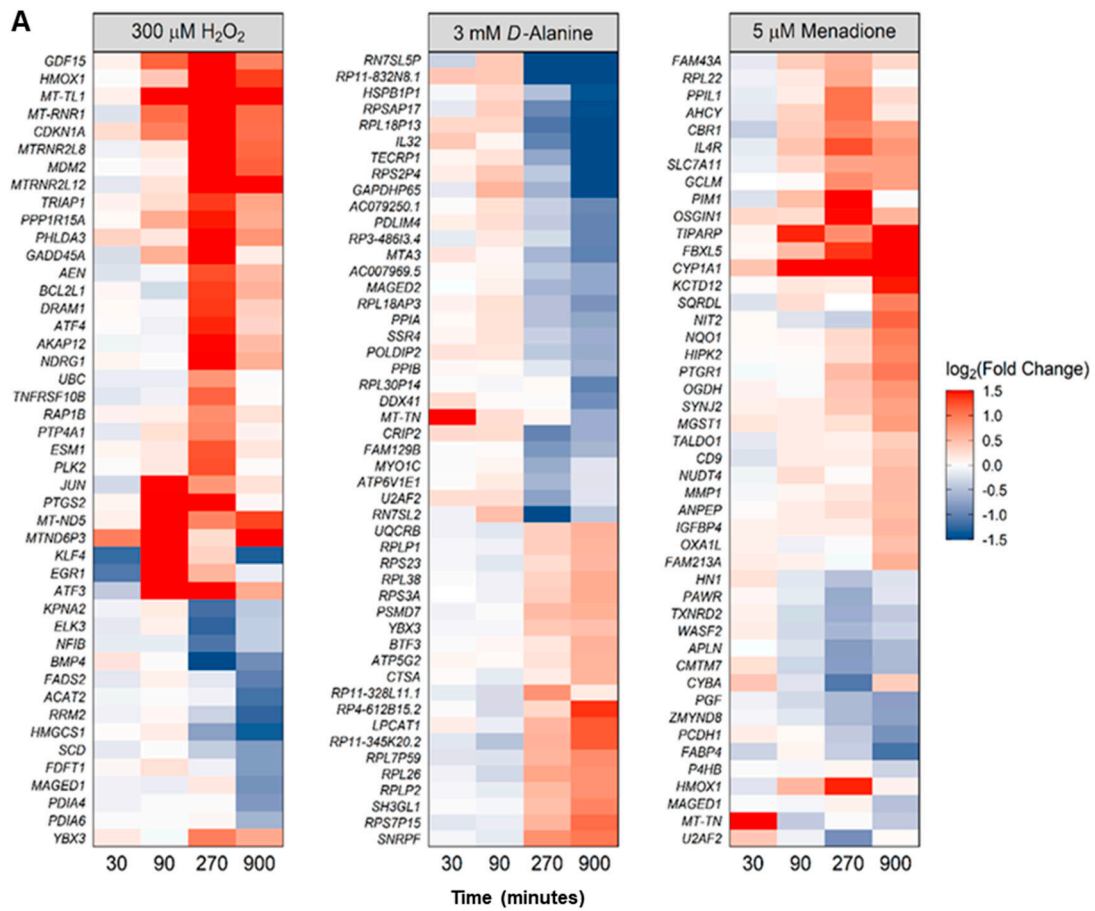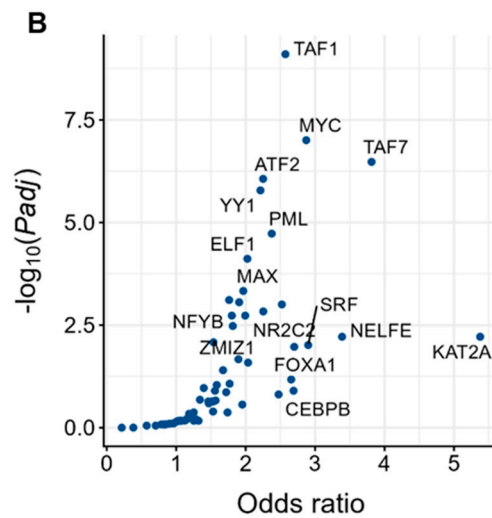

**Supplementary Figure S4: Differentially expressed genes in HUVEC in response to different ROS. (A): Heatmap of DEGs. (B): Transcription factor analysis performed with ENCODE and CheA for the genes commonly regulated by 300  $\mu\text{M}$   $\text{H}_2\text{O}_2$ , 3 mM *D*-Ala and 5  $\mu\text{M}$  menadione.**

**A**

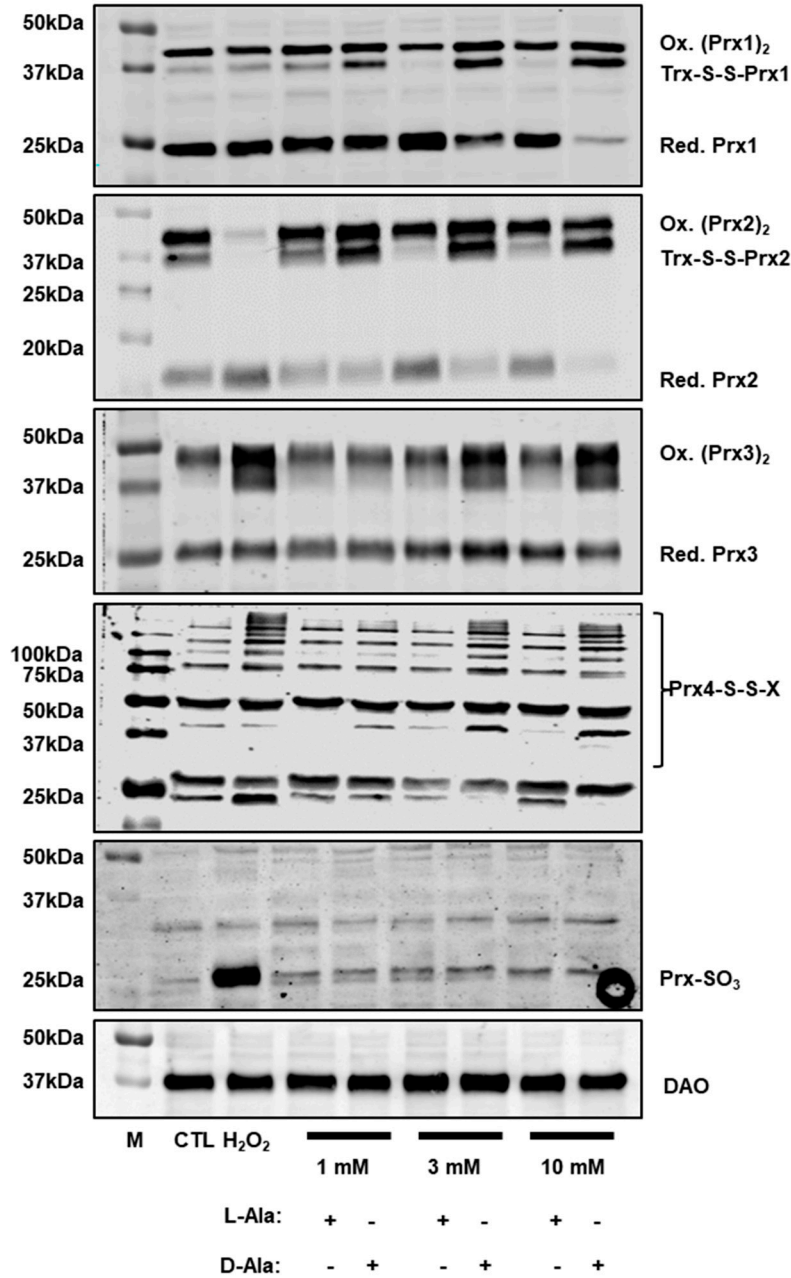

**B**

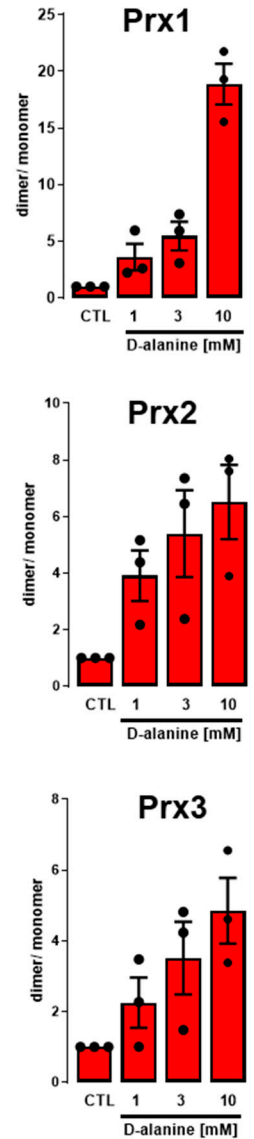

**Supplementary Figure S5: DAO-derived H<sub>2</sub>O<sub>2</sub> results in a dose-dependent oxidation of peroxiredoxins in HEK-DAO. (A):** Representative redox western blot for Prx1, Prx2, Prx3, Prx4 and Prx-SO<sub>3</sub> after exposure to different concentration of D- or L-Ala. **(B):** Quantification of redox western blotting by densitometry (n=3).

| 3 mM D-Ala/CTL |    |     |     |     |      |      |
|----------------|----|-----|-----|-----|------|------|
|                | 3' | 10' | 30' | 90' | 270' | 900' |
| ↑              | 1  | 9   | 14  | 1   | 6    | 3    |
| ↓              | 1  | 0   |     | 2   | 2    | 2    |
| <b>Total</b>   | 2  | 9   | 14  | 3   | 8    | 5    |

|              | 10 $\mu$ M H <sub>2</sub> O <sub>2</sub> /CTL |     |     |     |      |      | 300 $\mu$ M H <sub>2</sub> O <sub>2</sub> /CTL |     |     |     |      |      |
|--------------|-----------------------------------------------|-----|-----|-----|------|------|------------------------------------------------|-----|-----|-----|------|------|
|              | 3'                                            | 10' | 30' | 90' | 270' | 900' | 3'                                             | 10' | 30' | 90' | 270' | 900' |
| ↑            | 0                                             | 4   | 1   | 4   | 2    | 3    | 23                                             | 39  | 44  | 56  | 23   | 60   |
| ↓            | 1                                             | 0   | 1   | 0   | 56   | 1    | 16                                             | 24  | 31  | 30  | 10   | 2    |
| <b>Total</b> | 1                                             | 4   | 2   | 4   | 58   | 4    | 39                                             | 63  | 75  | 86  | 33   | 62   |

| 5 $\mu$ M Menadione/CTL |    |     |     |     |      |      |
|-------------------------|----|-----|-----|-----|------|------|
|                         | 3' | 10' | 30' | 90' | 270' | 900' |
| ↑                       | 1  | 6   | 3   | 16  | 18   | 4    |
| ↓                       | 5  | 5   | 3   | 3   | 19   | 13   |
| <b>Total</b>            | 6  | 11  | 6   | 19  | 37   | 17   |

**Supplementary Table S1:** Summary of altered metabolites.
